# Supplementary material for: Bisphenol A Exposure Alters Developmental Gene Expression in the Fetal Rhesus Macaque Uterus
Source: PLOS journal article supplement (doi:10.1371/journal.pone.0085894), 2014-01-23
Supplement: S2 (10.1371/journal.pone.0085894.s002) [file journal.pone.0085894.s002]

**Table S2. Selected biological function categories identified by Ingenuity analysis in comparison of control GD100 vs. GD165 animals<sup>a</sup>**

| <b>Category</b>                               | <b>Functions Annotations</b>                                                                                                                                                                                                                                                                                                                                                                                                           | <b>Activation z-score range</b> | <b>Maximum # molecules</b> |
|-----------------------------------------------|----------------------------------------------------------------------------------------------------------------------------------------------------------------------------------------------------------------------------------------------------------------------------------------------------------------------------------------------------------------------------------------------------------------------------------------|---------------------------------|----------------------------|
| Cell Cycle                                    | S phase, segregation of chromosomes, interphase of tumor cell lines                                                                                                                                                                                                                                                                                                                                                                    | -2.35 to -2.04                  | 60                         |
| Cellular Assembly and Organization            | Association of chromosome components, segregation of chromosomes                                                                                                                                                                                                                                                                                                                                                                       | -2.79 to -2.35                  | 33                         |
| Cell Death and Survival                       | Cytotoxicity, cell death of phagocytes, cytotoxicity of leukocytes and lymphocytes, cell death of antigen presenting cells                                                                                                                                                                                                                                                                                                             | 2.34 to 3.68                    | 44                         |
| Cell-To-Cell Signaling and Interaction        | Activation of cells, blood cells, leukocytes; recruitment of cells, blood cells, leukocytes, phagocytes, myeloid cells, granulocytes, neutrophils; response of mononuclear leukocytes; activation of connective tissue cells; sensitization of antigen presenting cells, phagocytes                                                                                                                                                    | 2.00 to 3.58                    | 153                        |
| Cellular Development                          | Differentiation of leukocytes, lymphocytes; maturation and expansion of blood cells, leukocytes; proliferation of stromal cells                                                                                                                                                                                                                                                                                                        | 2.05 to 3.34                    | 106                        |
| Cellular Function and Maintenance             | Function of blood cells, leukocytes, antigen presenting cells, phagocytes; cellular homeostasis; T cell homeostasis                                                                                                                                                                                                                                                                                                                    | 2.01 to 3.13                    | 207                        |
| Cellular Movement                             | Cell movement; cell movement of blood cells, leukocytes, phagocytes, myeloid cells, granulocytes, lymphocytes, antigen presenting cells, neutrophils; migration of cells, leukocytes; recruitment of blood cells, phagocytes, myeloid cells, granulocytes, neutrophils                                                                                                                                                                 | 2.12 to 4.12                    | 324                        |
| Hematological System Development and Function | Accumulation of leukocytes; activation of blood cells, leukocytes; cell movement of antigen presenting cells, granulocytes, leukocytes, lymphocytes, myeloid cells, neutrophils, phagocytes; differentiation of leukocytes, lymphocytes; expansion of leukocytes, T lymphocytes; quantity of blood cells, leukocytes, lymphocytes; recruitment of granulocytes, leukocytes, myeloid cells, neutrophils, phagocytes; T cell homeostasis | 2.13 to 4.09                    | 172                        |
| Inflammatory Response                         | Accumulation and activation of leukocytes; cell movement of neutrophils, phagocytes; cell-mediated response; chemotaxis of granulocytes, leukocytes, phagocytes; inflammatory response; recruitment of neutrophils, phagocytes                                                                                                                                                                                                         | 2.13 to 4.09                    | 120                        |
| Tissue Morphology                             | Quantity of blood cells, leukocytes, lymphocytes, mononuclear leukocytes, T lymphocytes                                                                                                                                                                                                                                                                                                                                                | 2.19 to 3.50                    | 172                        |
| Lipid Metabolism                              | Fatty acid metabolism; synthesis of fatty acid, eicosanoid, prostaglandin E2; metabolism of eicosanoid                                                                                                                                                                                                                                                                                                                                 | 2.49 to 3.05                    | 87                         |

<sup>a</sup>Selected from Ingenuity biological functions with predicted activation state significantly increased or decreased as indicated by an activation z-score > 2.0 or < -2.0; all p-values < 0.001.
