# Supplementary material for: Bisphenol A Exposure Alters Developmental Gene Expression in the Fetal Rhesus Macaque Uterus
Source: PLOS journal article supplement (doi:10.1371/journal.pone.0085894), 2014-01-23
Supplement: S4 (10.1371/journal.pone.0085894.s004) [file journal.pone.0085894.s004]

**Table S4. Selected upstream regulators identified by Ingenuity analysis in comparison of GD165 control vs. BPA treated animals<sup>a</sup>**

| <b>Upstream regulator</b> | <b>Description</b>                                                          | <b>Activation z-score</b> | <b>p-value of overlap</b> | <b># target molecules</b> | <b>Mechanistic network</b>      |
|---------------------------|-----------------------------------------------------------------------------|---------------------------|---------------------------|---------------------------|---------------------------------|
| mifepristone              | progesterone receptor antagonist                                            | -1.88                     | 4.13E-04                  | 13                        | PGR, mifepristone, progesterone |
| progesterone              | steroid hormone                                                             | 1.53                      | 1.59E-03                  | 17                        | PGR, progesterone               |
| AR                        | androgen receptor                                                           | 1.53                      | 4.50E-03                  | 11                        |                                 |
| dihydro-testosterone      | steroid hormone                                                             | 1.69                      | 3.24E-02                  | 14                        |                                 |
| rosiglitazone             | thiazolidinedione; insulin sensitizer                                       | 1.85                      | 5.53E-03                  | 13                        |                                 |
| IFNAR                     | interferon- $\alpha/\beta$ receptor                                         | 1.93                      | 1.35E-03                  | 4                         |                                 |
| PKD1                      | polycystin 1; ion channel                                                   | 1.94                      | 1.83E-02                  | 7                         |                                 |
| anisomycin                | antibiotic                                                                  | 1.95                      | 4.21E-03                  | 4                         |                                 |
| MLL                       | mixed lineage leukemia gene; transcription regulator                        | 1.98                      | 1.05E-03                  | 4                         |                                 |
| STAT1                     | Signal transducer and activator of transcription 1; transcription regulator | 2.22                      | 3.90E-02                  | 8                         |                                 |

<sup>a</sup>List filtered to keep upstream regulators with an activation z-score > 1.5 or < -1.5 and p-value of overlap < 0.05.
